# Supplementary material for: An obvious rolling process in the synthesis of Y2O3:Eu3+ micro-urchins built from nanoscrolls
Source: Royal Society of Chemistry journal article supplement (doi:10.1039/c2ce25871d), 2012-01-01
Supplement: c2ce25871d.pdf [file c2ce25871d.pdf]

### Electronic Supplementary Information

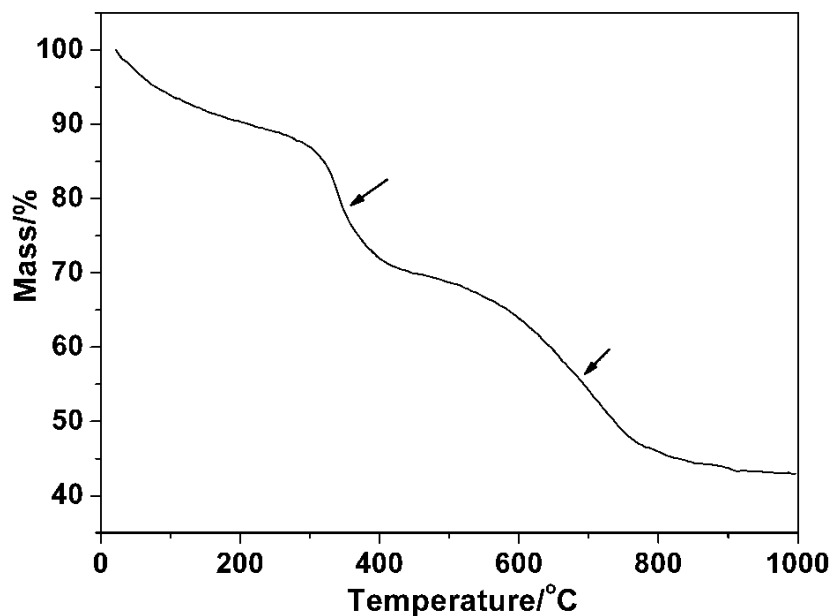

**Fig. S1** TGA curve of the as-synthesized precursor. The two arrows at about 250 and 650 °C correspond to the release of adsorbed water and oxidation of the organic reagent, respectively.

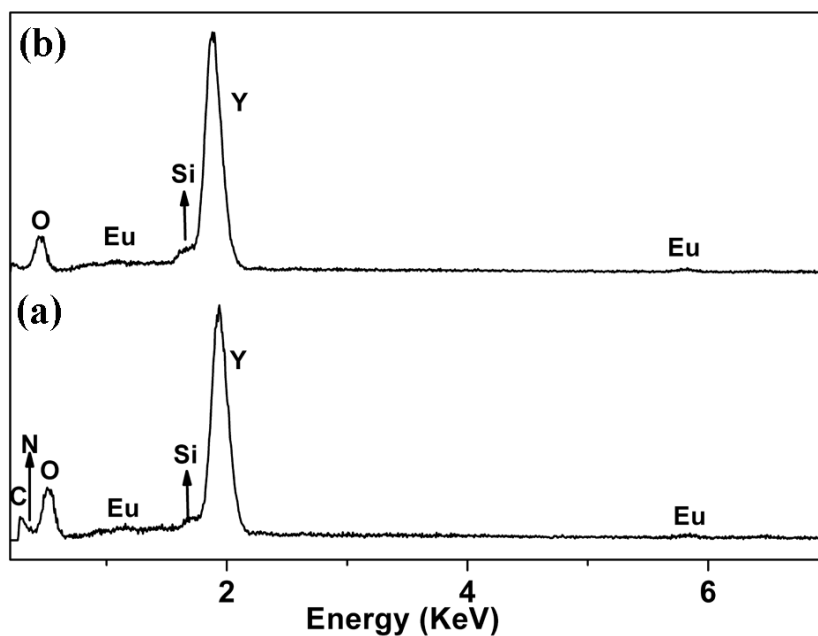

**Fig. S2** EDX spectra of the precursor (a) and the sample after calcination (b).

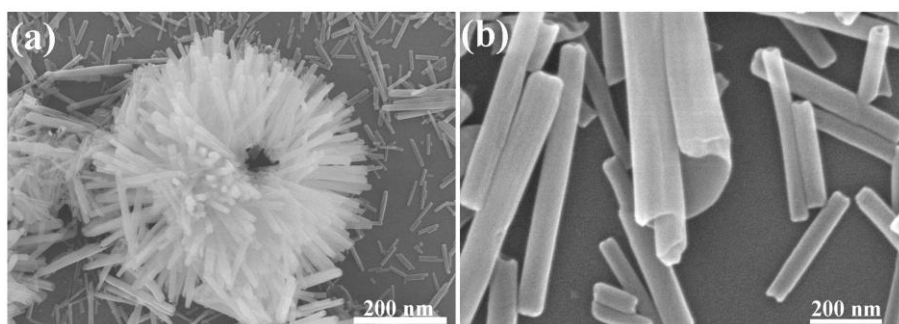

**Fig. S3** SEM images of the precursor obtained after ultrasound treatment for 20 min.

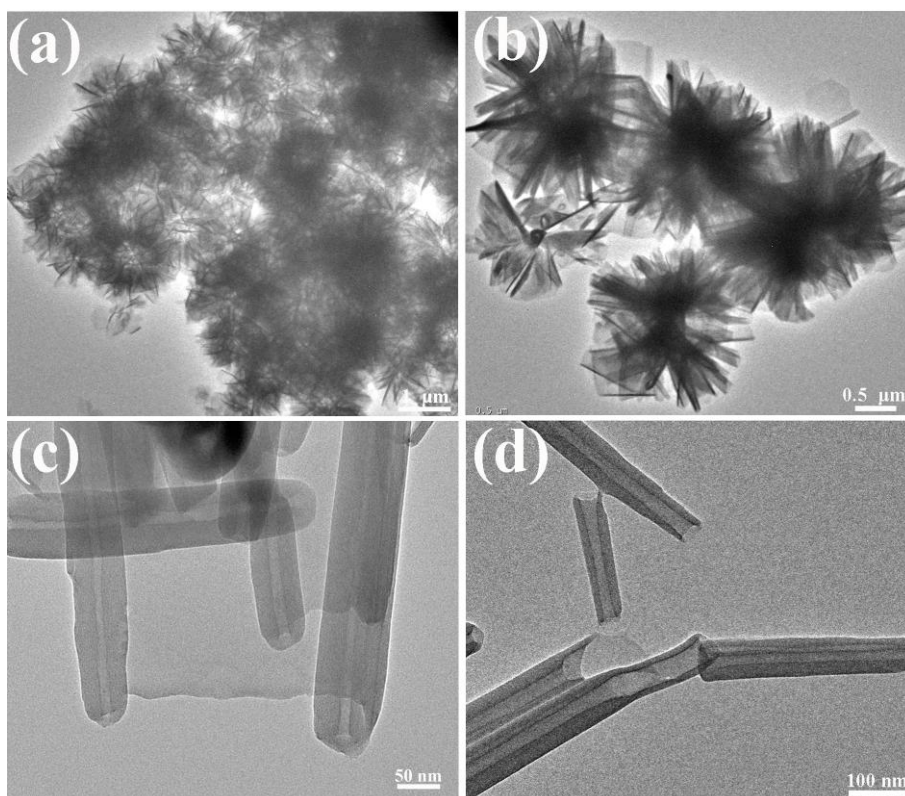

**Fig. S4** TEM images with different magnifications of the intermediates obtained after the reaction for (a, b) 2, (c) 4, and (d) 12 h, respectively.
